# Supplementary material for: Niobium oxide dispersed over PET waste activated carbon: an efficient catalyst for oxidation of the fungicide prothioconazole
Source: Royal Society of Chemistry journal article supplement (doi:10.1039/d4nj02826k), 2024-01-01
Supplement: d4nj02826k1.pdf [file d4nj02826k1.pdf]

## SUPPLEMENTARY INFORMATION

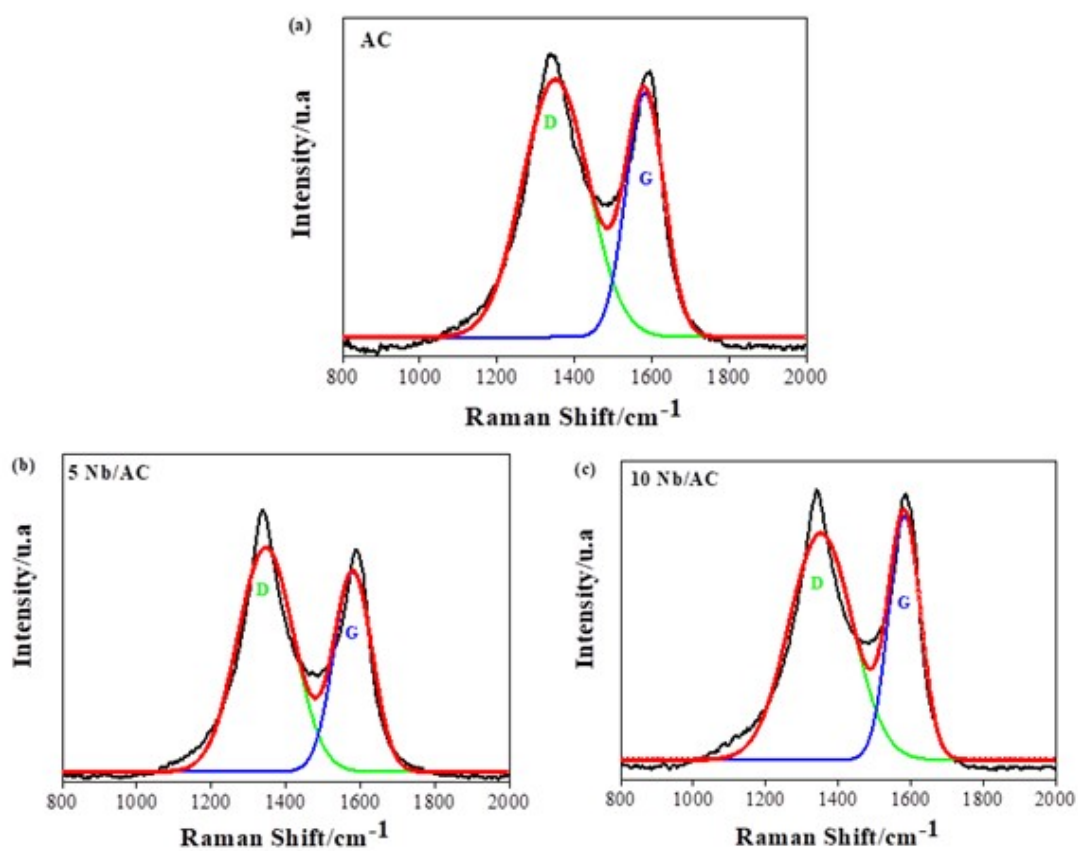

**Figure S1.** Raman Spectra using Gauss of the samples AC, 5 Nb/AC, and 10 Nb/AC.

**Table S1.** The relative intensity ratio between band G and band D ( $I_G/I_D$ ).

| Samples  | R <sup>2</sup> | $I_G/I_D$ |
|----------|----------------|-----------|
| AC       | 0.86           | 0.86      |
| 5 Nb/AC  | 0.93           | 0.89      |
| 10 Nb/AC | 0.90           | 1.07      |

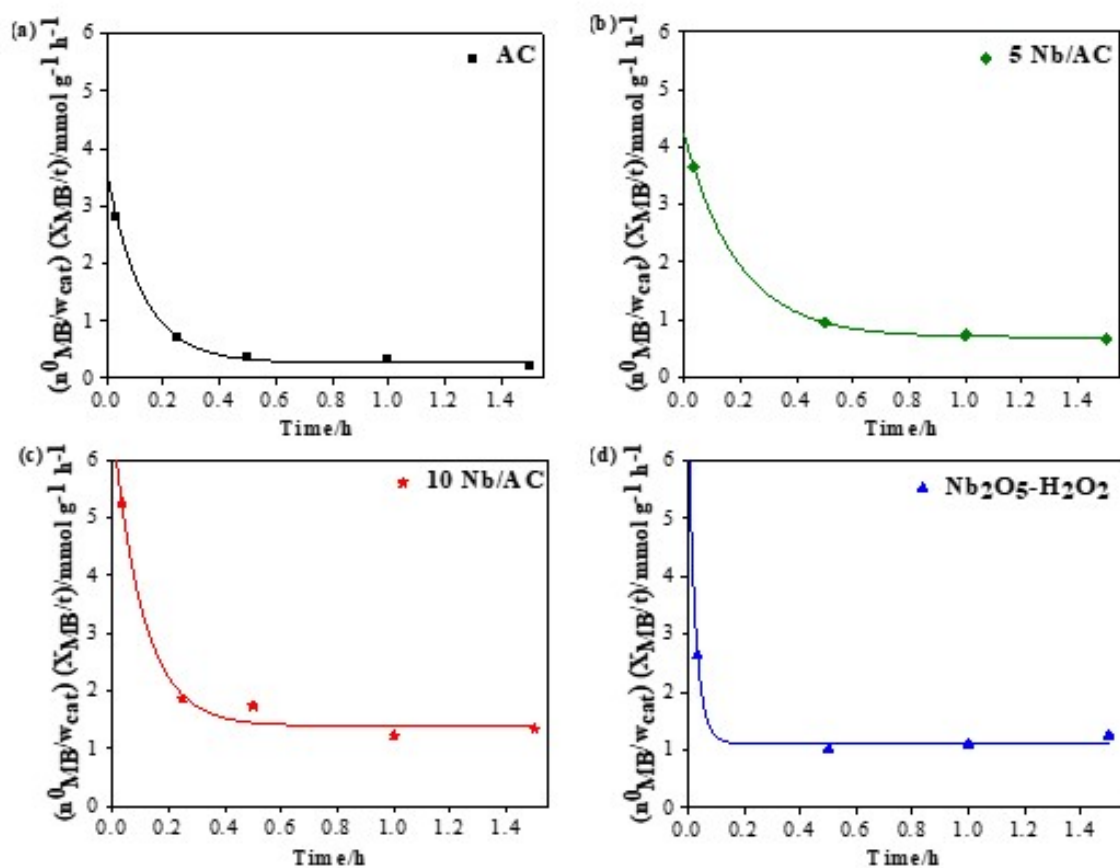

**Figure S2.** Calculations of initial MB degradation rates for AC (a), 5 Nb/AC (b), 10 Nb/AC (c) and  $\text{Nb}_2\text{O}_5\text{-H}_2\text{O}_2$  (d) catalysts.
